# Supplementary material for: Inhibiting KLRB1 expression is associated with impairing cancer immunity and leading to cancer progression and poor prognosis in breast invasive carcinoma patients
Source: Aging (Albany NY). 2023 Nov 20;15(22):13265–86. doi: 10.18632/aging.205239 (PMC10713394; doi:10.18632/aging.205239)
Supplement: Supplementary Figures [file aging-15-205239-s001.pdf]

## SUPPLEMENTARY FIGURES

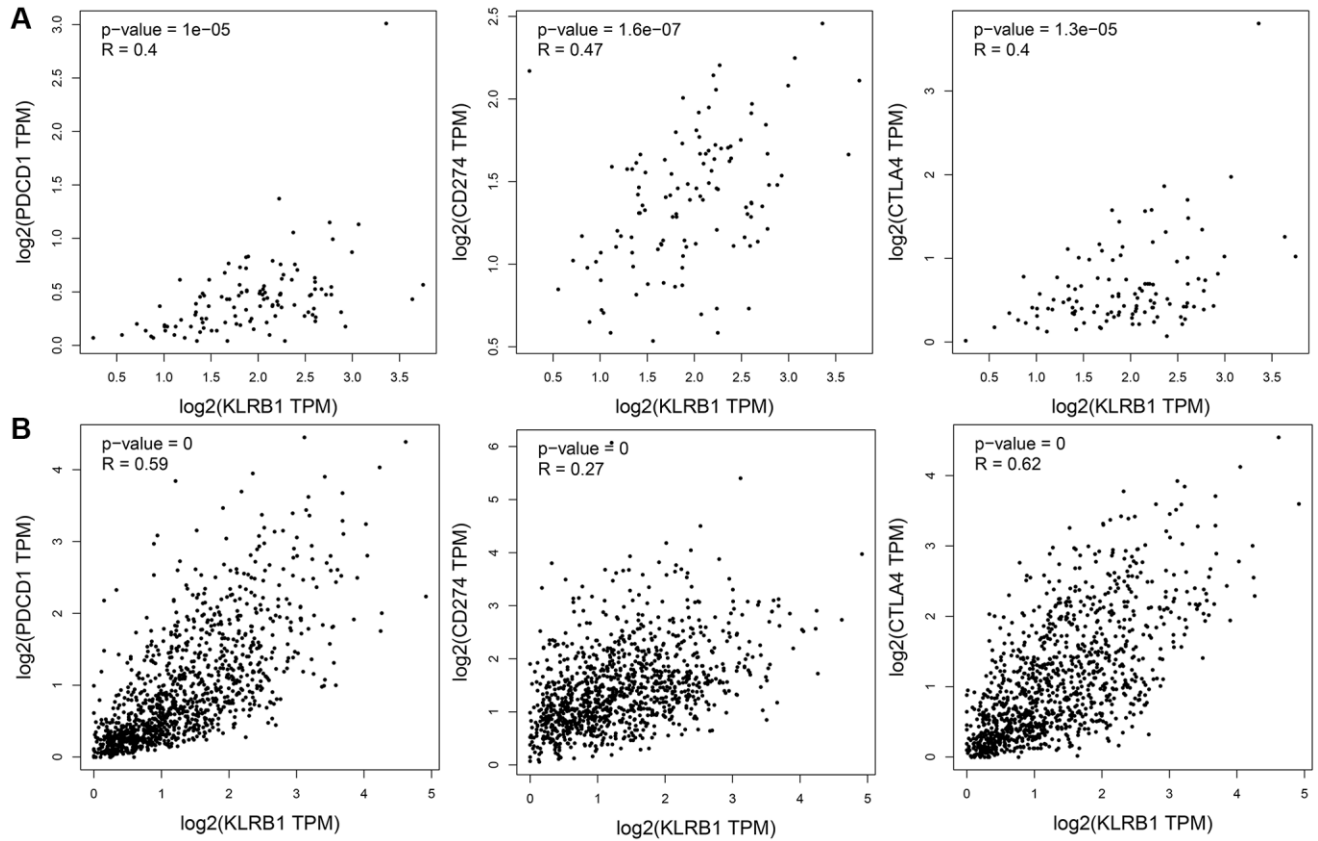

**Supplementary Figure 1. KLRB1 was positively correlated with the expression of immune genes PDCD1, CD274, and CTLA4 in GEPIA database. (A) Normal tissues; (B) BRCA tissues.**

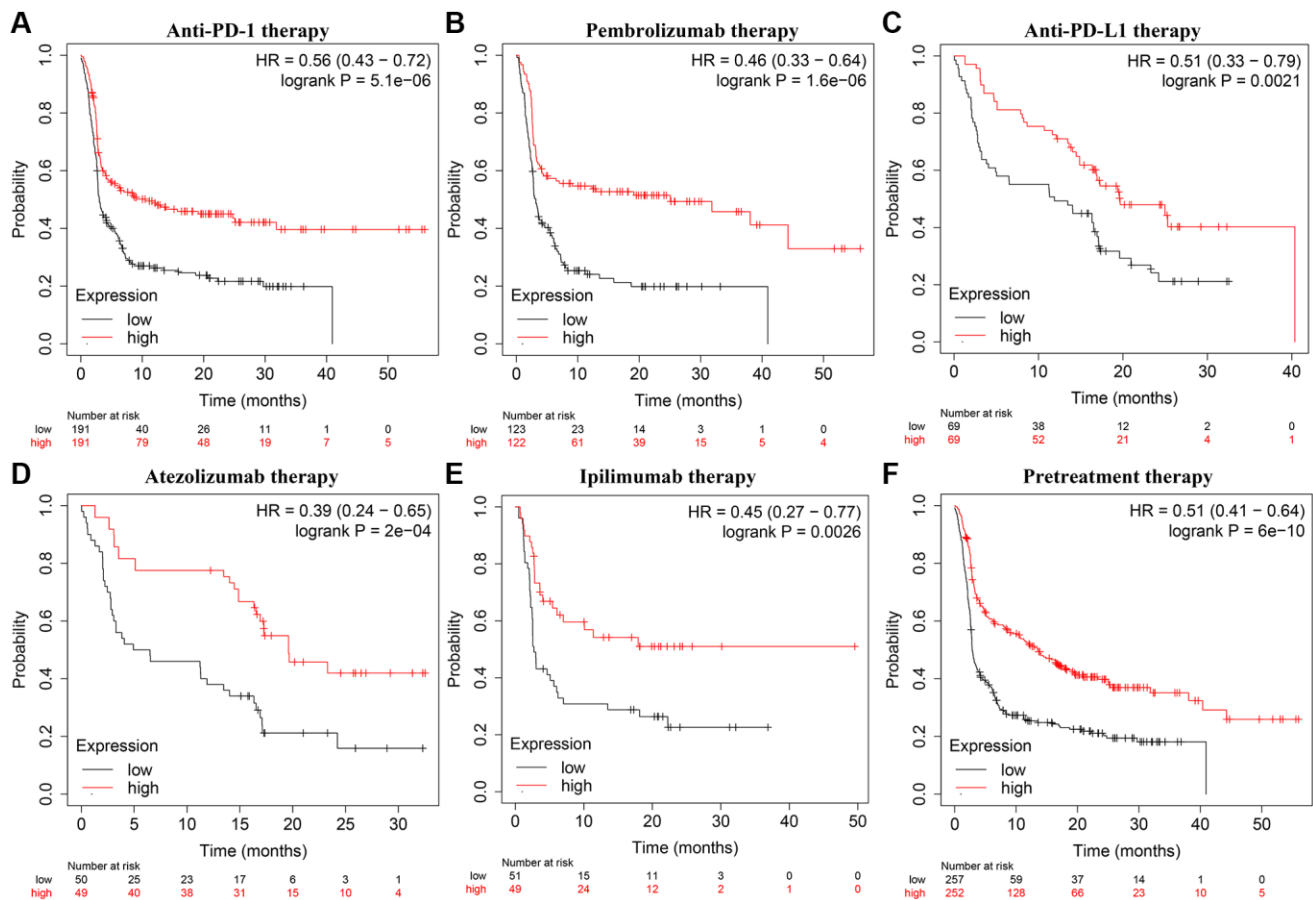

**Supplementary Figure 2. KLRB1 overexpression was correlated with the PFS in cancer patients on immunotherapy. (A)** Anti-PD-1; **(B)** Pembrolizumab; **(C)** Anti-PD-L1; **(D)** Atezolizumab; **(E)** Ipilimumab; **(F)** Pretreatment. Abbreviation: PFS: progression-free survival.
